# Supplementary material
Source: Springer Nature journal article supplement (https://mijn.bsl.nl/resource/supplementary/13047_2010_117_MOESM4_ESM.pdf/7110094)

### a) $\Delta$ Rearfoot Eversion Excursion

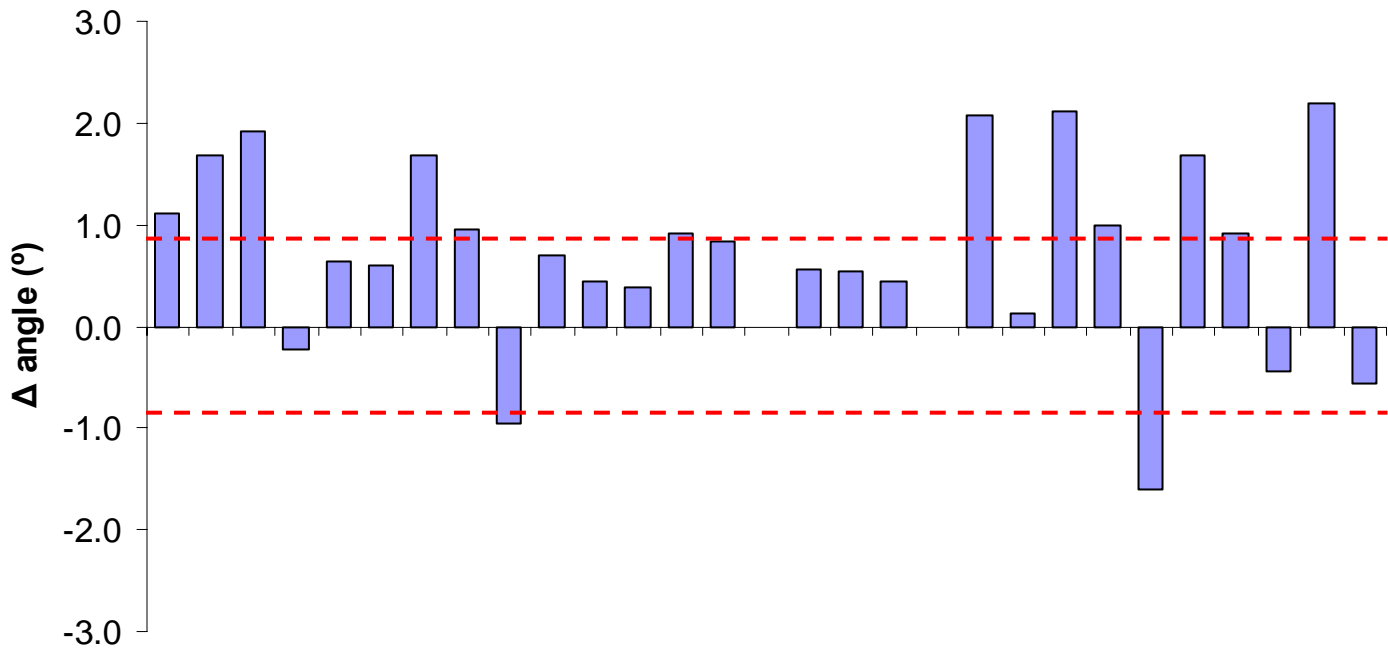

### b) $\Delta$ Forefoot Peak Abduction

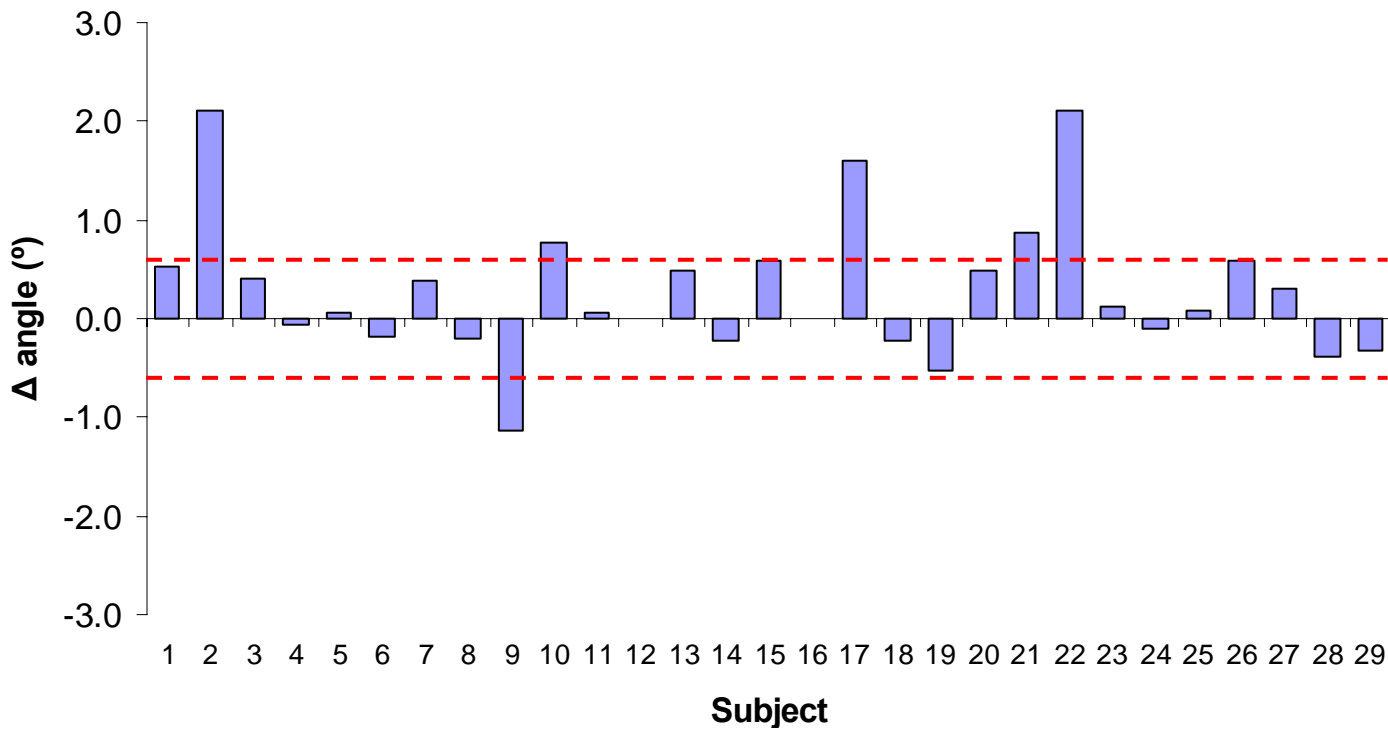

Supplement: MOESM4 [file 7110094]
